# Supplementary material for: Ionization controls for biomineralization-inspired CO2chemical looping at constant room temperature
Source: Royal Society of Chemistry journal article supplement (doi:10.1039/c4cp04115a), 2015-01-01
Supplement: c4cp04115a1.pdf [file c4cp04115a1.pdf]

## **Supporting Information for:**

### **Ionization controls for biomineralization-inspired CO<sub>2</sub> chemical looping at constant room temperature**

Zhaoming Liu<sup>†</sup>, Yadong Hu<sup>†</sup>, Hongqing Zhao<sup>†</sup>, Yang Wang<sup>†</sup>, Xurong Xu<sup>‡</sup>, Haihua Pan<sup>‡</sup>, Ruikang Tang<sup>\*,†</sup>

<sup>†</sup>Department of Chemistry, Zhejiang University, Hangzhou, Zhejiang 310027, China

<sup>‡</sup>Qiushi Academy for Advanced Studies, Zhejiang University, Hangzhou, Zhejiang 310027, China.

| Contents:     | Page  |
|---------------|-------|
| 1. Figures    | S1-S3 |
| 2. Tables     | S4-S8 |
| 3. Discussion | S8    |

#### **1. Figures**

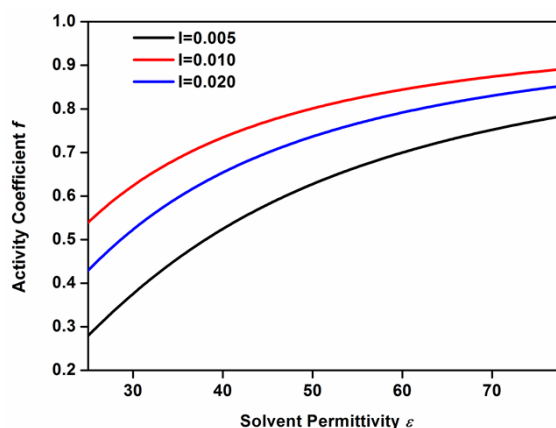

**Figure S1.** Relationship between activity coefficient  $f_{\pm}$  and  $\epsilon$ . The results were calculated from eqs. 5-7 ( $T = 298$  K,  $N_A = 6.02 \times 10^{23}$ ,  $k = 1.38 \times 10^{-16}$  erg/K,  $e = 4.8024 \times 10^{-10}$  esu,  $a = 10^{-1}$  nm,  $z_+ = z_- = 1$ ). The figure demonstrates that solvent permittivity reducing was followed by activity coefficient decrease.

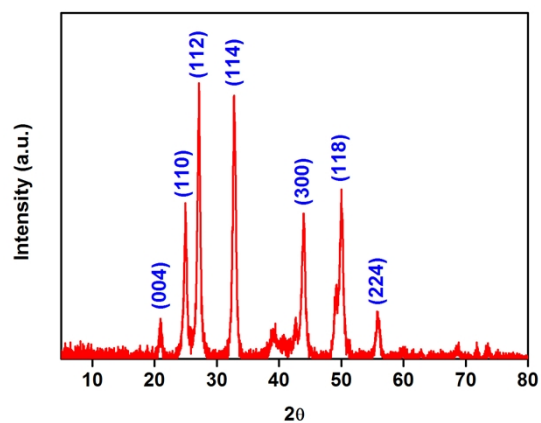

**Figure S2.** XRD pattern of the resulted precipitates during the CO<sub>2</sub> capture. It shows that the solid is vaterite.

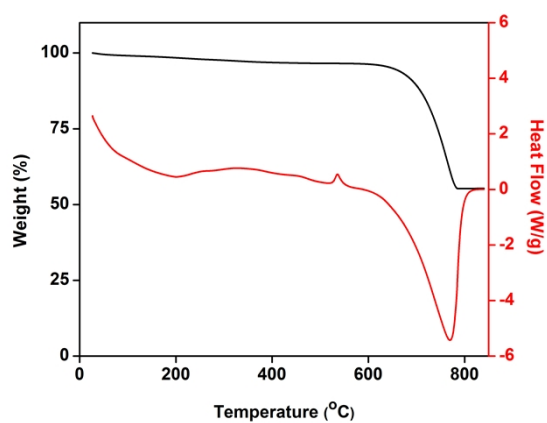

**Figure S3.** TGA of the resulted precipitates during the CO<sub>2</sub> capture. It confirms that the vaterite do not contain either water or ethanol.

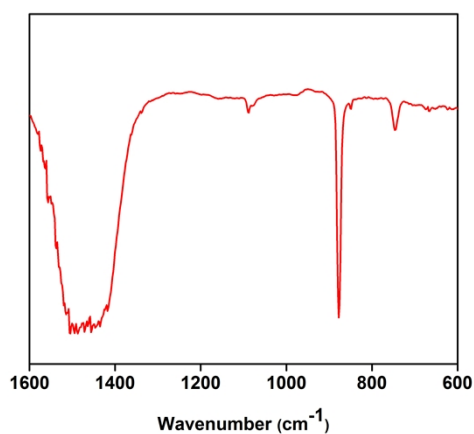

**Figure S4.** FT-IR of the resulted precipitates during the CO<sub>2</sub> capture. It confirms that the solid is pure vaterite.

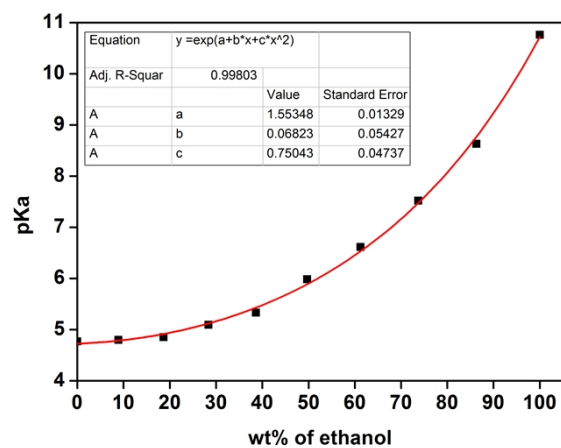

**Figure S5.** Calculated  $pK_a$  values of HAc in the binary solvent (line), which fits the experimental data (solid squares) well.<sup>1</sup>

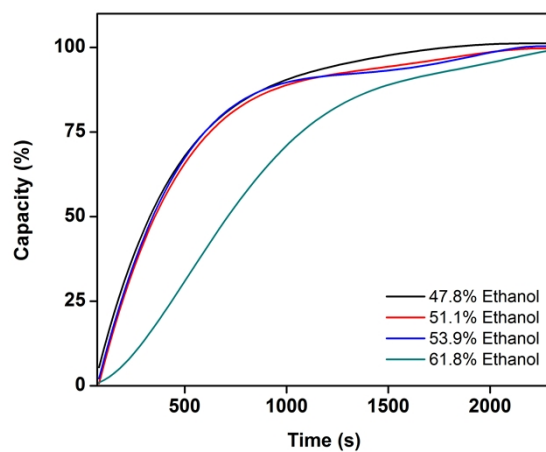

**Figure S6.**  $\text{CO}_2$  absorption kinetics in  $\text{Ca}(\text{Ac})_2\text{-C}_2\text{H}_5\text{OH-H}_2\text{O}$ . The  $\text{Ca}(\text{Ac})_2$  concentration was fixed at 0.08 M.

## 2. Tables

**Table S1. CO<sub>2</sub> capture in different organic/water binary solvent.**

| Organic solvent                 | $\epsilon_i^a$ | $\epsilon_{eff}^b$ | Reactivity <sup>c</sup> |
|---------------------------------|----------------|--------------------|-------------------------|
| Water                           | 78.5           | 78.5               | No                      |
| Glycerol                        | 46.5           | 55.1               | No                      |
| 1,2-Ethanediol                  | 41.4           | 51.2               | No                      |
| Methanol                        | 33.0           | 44.7               | Yes                     |
| Ethanol                         | 24.5           | 37.9               | Yes                     |
| Tetraethylene glycol            | 20.4           | 34.6               | Yes                     |
| Tetrahydrofurfuryl alcohol      | 13.5           | 28.9               | Yes                     |
| Diethylene glycol dimethylether | 7.2            | 23.6               | Yes                     |

<sup>a</sup>  $\epsilon_i$ , permittivity of pure organic solvent.

<sup>b</sup>  $\epsilon_{eff}$ , permittivity of binary solvent.

<sup>c</sup> Reactivity means whether CO<sub>2</sub> can be captured by the system containing 0.05 M Ca(Ac)<sub>2</sub> in the binary solvent containing 70% (v/v) organic solvent.

It is better to choose a solvent with low permittivity, low vapor pressure, high boiling point, low viscosity, unreactive and miscible with water, and low toxicity is necessary for CO<sub>2</sub> capture in industry.

**Table S2. Fitting of HAc  $K_a$  in C<sub>2</sub>H<sub>5</sub>OH-H<sub>2</sub>O binary solvent.<sup>a</sup>**

| wt % of ethanol | Slope    | Intercept | $r^2$  |
|-----------------|----------|-----------|--------|
| 0               | 2.60E-08 | 8.17E-07  | 0.9996 |
| 9               | 1.17E-08 | -3.35E-07 | 0.9981 |
| 19              | 4.69E-09 | -1.03E-06 | 0.9999 |
| 28              | 1.85E-09 | -6.39E-07 | 0.9997 |
| 39              | 8.78E-10 | -1.76E-06 | 0.9811 |
| 50              | 2.01E-10 | -1.94E-07 | 0.9987 |
| 61              | 5.70E-11 | -8.06E-08 | 0.9980 |
| 74              | 1.10E-11 | -1.00E-07 | 0.9984 |
| 86              | 1.21E-12 | -3.06E-08 | 0.9984 |
| 100             | 1.82E-14 | -9.58E-10 | 0.9018 |

<sup>a</sup> Raw data were measured in C<sub>2</sub>H<sub>5</sub>OH-H<sub>2</sub>O binary solvent containing different concentrations of HAc. The result of each fitting was calculated and shown in Figure S4.  $r^2$ , goodness of fit.

**Table S3. Data of ionization degree and pH in Figure 2.**

| wt% of ethanol | Concentration of HAc (mmol/L) | pH  | Ionization degree (%) |
|----------------|-------------------------------|-----|-----------------------|
| 0.0            | 25.00                         | 3.2 | 2.7                   |
| 9.4            | 25.00                         | 3.2 | 2.5                   |
| 19.1           | 25.00                         | 3.3 | 2.2                   |
| 28.9           | 25.00                         | 3.4 | 1.7                   |
| 38.7           | 25.00                         | 3.5 | 1.3                   |
| 48.4           | 25.00                         | 3.7 | 0.8                   |
| 58.2           | 25.00                         | 4.0 | 0.4                   |
| 68.0           | 25.00                         | 4.3 | 0.2                   |
| 77.7           | 25.00                         | 4.7 | 0.1                   |
| 87.5           | 25.00                         | 5.3 | 0.0                   |
| 97.3           | 25.00                         | 5.9 | 0.0                   |
| 0.0            | 12.50                         | 3.3 | 3.8                   |
| 9.4            | 12.50                         | 3.4 | 3.5                   |
| 19.1           | 12.50                         | 3.4 | 3.0                   |
| 28.9           | 12.50                         | 3.5 | 2.4                   |
| 38.7           | 12.50                         | 3.7 | 1.8                   |
| 48.4           | 12.50                         | 3.9 | 1.1                   |
| 58.2           | 12.50                         | 4.1 | 0.6                   |
| 68.0           | 12.50                         | 4.5 | 0.3                   |
| 77.7           | 12.50                         | 4.9 | 0.1                   |
| 87.5           | 12.50                         | 5.4 | 0.0                   |
| 97.3           | 12.50                         | 6.1 | 0.0                   |
| 0.0            | 6.24                          | 3.5 | 5.3                   |
| 9.4            | 6.24                          | 3.5 | 4.9                   |
| 19.1           | 6.24                          | 3.6 | 4.3                   |
| 28.9           | 6.24                          | 3.7 | 3.4                   |
| 38.7           | 6.24                          | 3.8 | 2.5                   |
| 48.4           | 6.24                          | 4.0 | 1.6                   |
| 58.2           | 6.24                          | 4.3 | 0.9                   |
| 68.0           | 6.24                          | 4.6 | 0.4                   |
| 77.7           | 6.24                          | 5.1 | 0.1                   |
| 87.5           | 6.24                          | 5.6 | 0.0                   |
| 97.3           | 6.24                          | 6.2 | 0.0                   |
| 0.0            | 3.12                          | 3.6 | 7.4                   |
| 9.4            | 3.12                          | 3.7 | 6.8                   |
| 19.1           | 3.12                          | 3.7 | 6.0                   |
| 28.9           | 3.12                          | 3.8 | 4.8                   |
| 38.7           | 3.12                          | 4.0 | 3.5                   |
| 48.4           | 3.12                          | 4.2 | 2.2                   |
| 58.2           | 3.12                          | 4.4 | 1.2                   |
| 68.0           | 3.12                          | 4.8 | 0.5                   |
| 77.7           | 3.12                          | 5.2 | 0.2                   |

| wt% of ethanol | Concentration of HAc (mmol/L) | pH  | Ionization degree (%) |
|----------------|-------------------------------|-----|-----------------------|
| 87.5           | 3.12                          | 5.7 | 0.1                   |
| 97.3           | 3.12                          | 6.4 | 0.0                   |
| 0.0            | 1.56                          | 3.8 | 10.3                  |
| 9.4            | 1.56                          | 3.8 | 9.5                   |
| 19.1           | 1.56                          | 3.9 | 8.3                   |
| 28.9           | 1.56                          | 4.0 | 6.7                   |
| 38.7           | 1.56                          | 4.1 | 4.9                   |
| 48.4           | 1.56                          | 4.3 | 3.1                   |
| 58.2           | 1.56                          | 4.6 | 1.7                   |
| 68.0           | 1.56                          | 4.9 | 0.8                   |
| 77.7           | 1.56                          | 5.4 | 0.3                   |
| 87.5           | 1.56                          | 5.9 | 0.1                   |
| 97.3           | 1.56                          | 6.5 | 0.0                   |
| 0.0            | 0.78                          | 4.0 | 14.3                  |
| 9.4            | 0.78                          | 4.0 | 13.2                  |
| 19.1           | 0.78                          | 4.0 | 11.6                  |
| 28.9           | 0.78                          | 4.1 | 9.4                   |
| 38.7           | 0.78                          | 4.3 | 6.9                   |
| 48.4           | 0.78                          | 4.5 | 4.4                   |
| 58.2           | 0.78                          | 4.7 | 2.4                   |
| 68.0           | 0.78                          | 5.1 | 1.1                   |
| 77.7           | 0.78                          | 5.5 | 0.4                   |
| 87.5           | 0.78                          | 6.0 | 0.1                   |
| 97.3           | 0.78                          | 6.7 | 0.0                   |
| 0.0            | 0.39                          | 4.1 | 19.6                  |
| 9.4            | 0.39                          | 4.2 | 18.1                  |
| 19.1           | 0.39                          | 4.2 | 16.0                  |
| 28.9           | 0.39                          | 4.3 | 13.0                  |
| 38.7           | 0.39                          | 4.4 | 9.6                   |
| 48.4           | 0.39                          | 4.6 | 6.2                   |
| 58.2           | 0.39                          | 4.9 | 3.4                   |
| 68.0           | 0.39                          | 5.2 | 1.5                   |
| 77.7           | 0.39                          | 5.7 | 0.6                   |
| 87.5           | 0.39                          | 6.2 | 0.2                   |
| 97.3           | 0.39                          | 6.8 | 0.0                   |
| 0.0            | 0.20                          | 4.3 | 26.4                  |
| 9.4            | 0.20                          | 4.3 | 24.6                  |
| 19.1           | 0.20                          | 4.4 | 21.8                  |
| 28.9           | 0.20                          | 4.5 | 17.9                  |
| 38.7           | 0.20                          | 4.6 | 13.3                  |
| 48.4           | 0.20                          | 4.8 | 8.6                   |
| 58.2           | 0.20                          | 5.0 | 4.8                   |
| 68.0           | 0.20                          | 5.4 | 2.2                   |

| wt% of ethanol | Concentration of HAc (mmol/L) | pH  | Ionization degree (%) |
|----------------|-------------------------------|-----|-----------------------|
| 77.7           | 0.20                          | 5.8 | 0.8                   |
| 87.5           | 0.20                          | 6.3 | 0.2                   |
| 97.3           | 0.20                          | 7.0 | 0.1                   |
| 0.0            | 0.10                          | 4.5 | 35.1                  |
| 9.4            | 0.10                          | 4.5 | 32.9                  |
| 19.1           | 0.10                          | 4.5 | 29.3                  |
| 28.9           | 0.10                          | 4.6 | 24.3                  |
| 38.7           | 0.10                          | 4.8 | 18.2                  |
| 48.4           | 0.10                          | 4.9 | 12.0                  |
| 58.2           | 0.10                          | 5.2 | 6.7                   |
| 68.0           | 0.10                          | 5.5 | 3.1                   |
| 77.7           | 0.10                          | 6.0 | 1.1                   |
| 87.5           | 0.10                          | 6.5 | 0.3                   |
| 97.3           | 0.10                          | 7.1 | 0.1                   |

**Table S4.** Data of balance value in Figure 3

| Concentration of Ca(Ac) <sub>2</sub> (mol/L) | Balance value (wt % of ethanol) | Concentration of Ca(Ac) <sub>2</sub> (mol/L) | Balance value (wt % of ethanol) |
|----------------------------------------------|---------------------------------|----------------------------------------------|---------------------------------|
| 0.010                                        | 67.2                            | 0.108                                        | 45.6                            |
| 0.014                                        | 63.1                            | 0.116                                        | 45.4                            |
| 0.023                                        | 58.8                            | 0.123                                        | 45.3                            |
| 0.031                                        | 55.5                            | 0.131                                        | 45.2                            |
| 0.039                                        | 53.0                            | 0.139                                        | 45.1                            |
| 0.047                                        | 51.1                            | 0.146                                        | 45.1                            |
| 0.054                                        | 49.6                            | 0.154                                        | 45.0                            |
| 0.062                                        | 48.5                            | 0.162                                        | 45.0                            |
| 0.070                                        | 47.6                            | 0.169                                        | 45.0                            |
| 0.077                                        | 47.0                            | 0.177                                        | 45.0                            |
| 0.085                                        | 46.5                            | 0.185                                        | 44.9                            |
| 0.093                                        | 46.1                            | 0.192                                        | 44.9                            |
| 0.100                                        | 45.8                            | 0.200                                        | 44.9                            |

**Table S5.** Fitting of enthalpy change of reaction in C<sub>2</sub>H<sub>5</sub>OH-H<sub>2</sub>O binary solvent.<sup>a</sup>

| wt % of ethanol | slope   | intercept | r <sup>2</sup> |
|-----------------|---------|-----------|----------------|
| 47.8            | -3861.5 | 5.4192    | 0.9839         |
| 51.1            | -2853.7 | 3.9259    | 0.9890         |
| 53.9            | 9083.9  | -35.874   | 0.9958         |
| 58.4            | 4139.6  | -19.401   | 0.9631         |
| 61.8            | -3621.6 | 7.157     | 0.9306         |

<sup>a</sup> Raw data was measured from Ca(Ac)<sub>2</sub>-C<sub>2</sub>H<sub>5</sub>OH-H<sub>2</sub>O system containing 0.08 M Ca(Ac)<sub>2</sub>. The result of each fitting was calculated and shown in Figure 3. *r*<sup>2</sup> represents the goodness of fit.

### 3. Discussion

**Influence of solubility against acid dissolution.** The solubility of CaCO<sub>3</sub> in water is 1.3×10<sup>-5</sup> g/mL at 25 °C.<sup>2,3</sup> However, the amount of CaCO<sub>3</sub> dissolved by HAc is significantly higher. For example, about 5.3×10<sup>-4</sup> g/mL CaCO<sub>3</sub> dissolved by changing 80 wt% of ethanol to 50 wt% with 0.05 M Ca(Ac)<sub>2</sub>, which is 40 times higher than the solubility, indicating that the influence of solubility is regardless to the acid dissolution.

### Reference

- 1 Grunwald, E.; Berkowitz, B. J. *J. Am. Chem. Soc.* **1951**, 73, 4939.
- 2 Gordon, A.; Tristan, F.. *SI Chemical Data Book* (4th ed.). *John Wiley & Sons Australia, Ltd.* ISBN 978-0-470-81638-7.
- 3 Rohleder, J.; Kroker E.. *Calcium Carbonate: From the Cretaceous Period Into the 21st Century.* *Springer Science & Business Media.* ISBN 3-7643-6425-4.
